# Supplementary material for: Prevalence and Incidence of Osteoarthritis: A Population-Based Retrospective Cohort Study
Source: MDPI journal article supplement (doi:10.3390/jcm10184282), 2021-09-21
Supplement: s1 [file s1]

## Supplementary material

**Table S1.** Trends for OA prevalence between 2013 and 2017, by sex.

| Year | Total   |                |                             | Female  |                |                             | Male   |                |                             |
|------|---------|----------------|-----------------------------|---------|----------------|-----------------------------|--------|----------------|-----------------------------|
|      | Cases   | MHS population | Prevalence per 1000 persons | Cases   | MHS population | Prevalence per 1000 persons | Cases  | MHS population | Prevalence per 1000 persons |
| 2013 | 122,481 | 1,337,111      | 91.6                        | 80,440  | 703,263        | 114.4                       | 42,041 | 633,848        | 66.3                        |
| 2014 | 133,014 | 1,372,126      | 96.9                        | 86,896  | 721,432        | 120.4                       | 46,118 | 650,694        | 70.9                        |
| 2015 | 143,900 | 1,404,452      | 102.5                       | 93,612  | 738,194        | 126.8                       | 50,288 | 666,258        | 75.5                        |
| 2016 | 155,155 | 1,450,360      | 107.0                       | 100,560 | 762,024        | 132.0                       | 54,595 | 688,336        | 79.3                        |
| 2017 | 167,519 | 1,501,612      | 111.6                       | 108,027 | 788,134        | 137.1                       | 59,492 | 713,478        | 83.4                        |

Abbreviations: OA, osteoarthritis; MHS, Maccabi healthcare services.

**Table S2.** Trends for OA incidence between 2013 and 2017, by age and sex.

|                | Year | Total  |                |                            | Female |                |                            | Male  |                |                            |
|----------------|------|--------|----------------|----------------------------|--------|----------------|----------------------------|-------|----------------|----------------------------|
|                |      | Cases  | MHS population | Incidence per 1000 persons | Cases  | MHS population | Incidence per 1000 persons | Cases | MHS population | Incidence per 1000 persons |
| Total patients | 2013 | 9,838  | 1,337,111      | 7.36                       | 6,108  | 703,263        | 8.69                       | 3,730 | 633,848        | 5.88                       |
|                | 2014 | 10,533 | 1,372,126      | 7.68                       | 6,456  | 721,432        | 8.95                       | 4,077 | 650,694        | 6.27                       |
|                | 2015 | 10,886 | 1,404,452      | 7.75                       | 6,716  | 738,194        | 9.10                       | 4,170 | 666,258        | 6.26                       |
|                | 2016 | 11,255 | 1,450,360      | 7.76                       | 6,948  | 762,024        | 9.12                       | 4,307 | 688,336        | 6.26                       |
|                | 2017 | 12,364 | 1,501,612      | 8.23                       | 7,467  | 788,134        | 9.47                       | 4,897 | 713,478        | 6.86                       |
| <60 years      | 2013 | 4,696  | 1,061,165      | 4.43                       | 2,918  | 552,656        | 5.28                       | 1,778 | 508,509        | 3.50                       |
|                | 2014 | 5,007  | 1,080,612      | 4.63                       | 3,124  | 562,477        | 5.55                       | 1,883 | 518,135        | 3.63                       |
|                | 2015 | 5,059  | 1,097,688      | 4.61                       | 3,187  | 570,871        | 5.58                       | 1,872 | 526,817        | 3.55                       |
|                | 2016 | 5,193  | 1,118,620      | 4.64                       | 3,264  | 581,578        | 5.61                       | 1,929 | 537,042        | 3.59                       |
|                | 2017 | 5,579  | 1,149,626      | 4.85                       | 3,459  | 597,769        | 5.79                       | 2,120 | 551,857        | 3.84                       |
| 60-70 years    | 2013 | 3,269  | 167,409        | 19.53                      | 2,044  | 88,497         | 23.10                      | 1,225 | 78,912         | 15.52                      |
|                | 2014 | 3,630  | 178,387        | 20.35                      | 2,196  | 94,400         | 23.26                      | 1,434 | 83,987         | 17.07                      |
|                | 2015 | 3,796  | 189,238        | 20.06                      | 2,334  | 100,147        | 23.31                      | 1,462 | 89,091         | 16.41                      |
|                | 2016 | 3,882  | 197,137        | 19.69                      | 2,392  | 104,383        | 22.92                      | 1,490 | 92,754         | 16.06                      |
|                | 2017 | 4,248  | 201,821        | 21.05                      | 2,530  | 106,677        | 23.72                      | 1,718 | 95,144         | 18.06                      |
| >70 years      | 2013 | 1,873  | 109,278        | 17.14                      | 1,146  | 61,472         | 18.64                      | 727   | 47,806         | 15.21                      |
|                | 2014 | 1,896  | 113,310        | 16.73                      | 1,136  | 63,607         | 17.86                      | 760   | 49,703         | 15.29                      |
|                | 2015 | 2,031  | 118,733        | 17.11                      | 1,195  | 66,415         | 17.99                      | 836   | 52,318         | 15.98                      |
|                | 2016 | 2,180  | 126,003        | 17.30                      | 1,292  | 70,276         | 18.38                      | 888   | 55,727         | 15.93                      |
|                | 2017 | 2,537  | 137,861        | 18.40                      | 1,478  | 76,746         | 19.26                      | 1,059 | 61,115         | 17.33                      |

Abbreviations: OA, osteoarthritis; MHS, Maccabi healthcare services.
